# Supplementary material for: A robust and flexible CRISPR/Cas9-based system for neutrophil-specific gene inactivation in zebrafish
Source: Oxford University Press journal article supplement (doi:10.1242/jcs.258574), 2021-03-15
Supplement: jcs258574supp.pdf [file jcs258574supp.pdf]

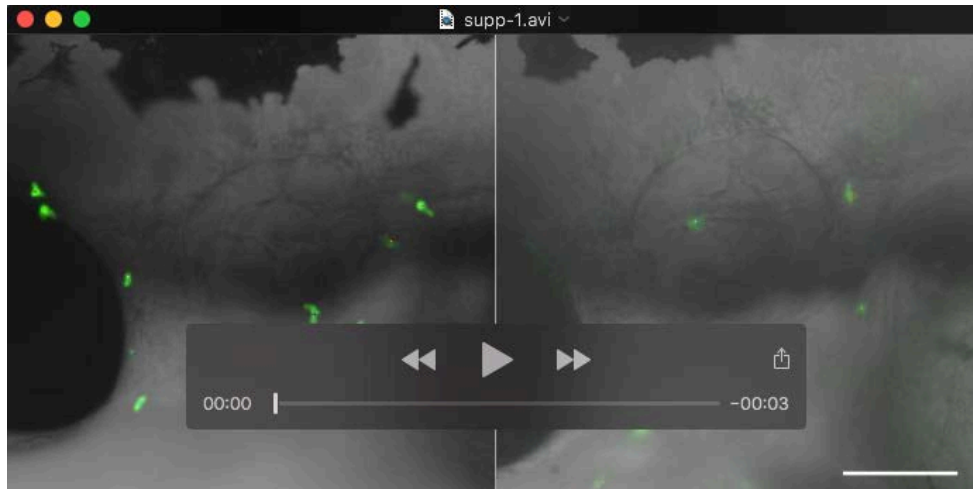

**Movie 1. Tracked movies of migrating neutrophils in the head mesenchyme transiently expressing control or *rac2* sgRNAs.** The video shows the motility of neutrophils in 3 dpf *Tg(lyzC:Cas9, cry:GFP)<sup>pu26</sup>* zebrafish larvae injected with plasmids carrying control or *rac2* sgRNAs. Videos were recorded for 30 min with 1min interval. Representative videos from n = 3 independent experiments with 4 fish each group are shown. Scale bar: 100  $\mu$ m.

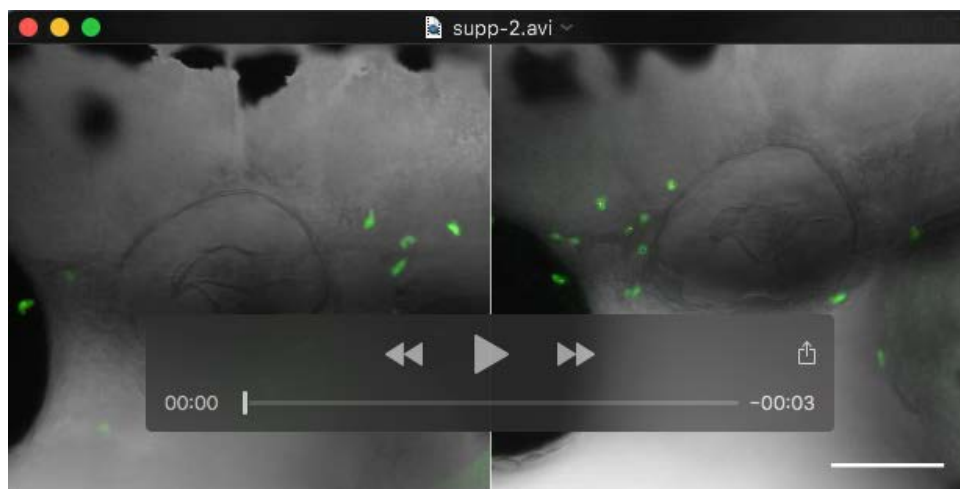

**Movie 2. Tracked movies of neutrophil motility in the head mesenchyme of the control and *rac2* knockout stable lines.** We generated stable lines by crossing *Tg(lyzC:Cas9, Cry:GFP)<sup>pu26</sup>* with *Tg(u6a/c: ctrl sgRNA, lyzC:GFP)<sup>pu27</sup>* or *Tg(u6a/c: rac2 sgRNA, lyzC:GFP)<sup>pu28</sup>*. The video shows the motility of neutrophils in 3 dpf zebrafish offspring larvae. Videos were recorded for 30 min with 1 min interval. Representative videos from n = 3 independent experiments with 3 fish each group are shown. Scale bar: 100  $\mu$ m.

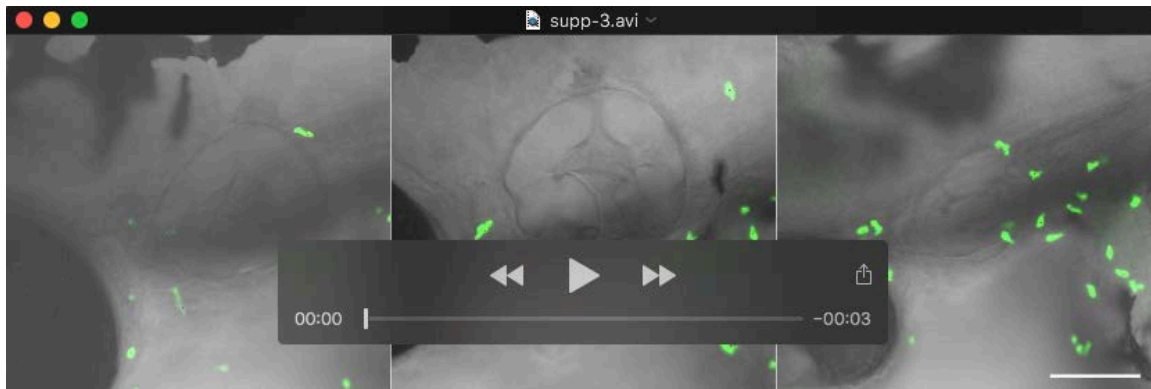

**Movie 3. Tracked movies of neutrophil motility in the head mesenchyme of the no-guide control, control and *rac2* sgRNAs stable lines.** The video shows the motility of neutrophils in 3 dpf zebrafish larvae of *Tg(lyzC:GFP)*, *Tg(u6a/c: ctrl sgRNA, lyzC:GFP)<sup>pu27</sup>* or *Tg(u6a/c: rac2 sgRNA, lyzC:GFP)<sup>pu28</sup>*. Videos were recorded for 30 min with 1 min interval. Representative videos from n = 3 independent experiments with 3 fish each group are shown. Scale bar: 100  $\mu$ m.

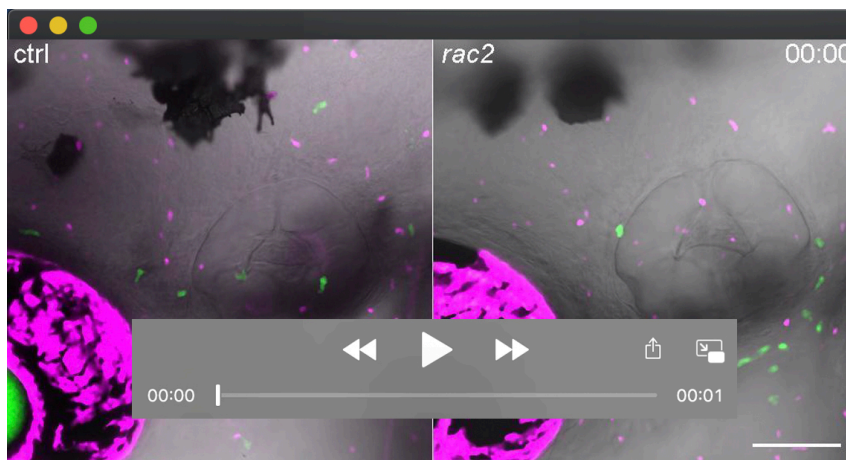

**Movie 4. Tracked movies of neutrophil and macrophage motility in the head mesenchyme of the control (left) and *rac2* knockout (right) stable lines.** We generated stable lines by crossing *Tg(lyzC:Cas9, Cry:GFP)<sup>pu26</sup>* with *Tg(u6a/c: ctrl sgRNA, lyzC:GFP, mpeg:mcherry-H2B)<sup>pu27</sup>* or *Tg(u6a/c: rac2 sgRNA, lyzC:GFP, mpeg:mcherry-H2B)<sup>pu28</sup>*. The video shows the motility of neutrophils (yellow tracks) and macrophages (red tracks) in 3 dpf zebrafish offspring larvae. Videos were recorded for 90 min with 3 min interval. Representative videos from n = 3 independent experiments with 3 fish each group are shown. Scale bar: 100  $\mu$ m.

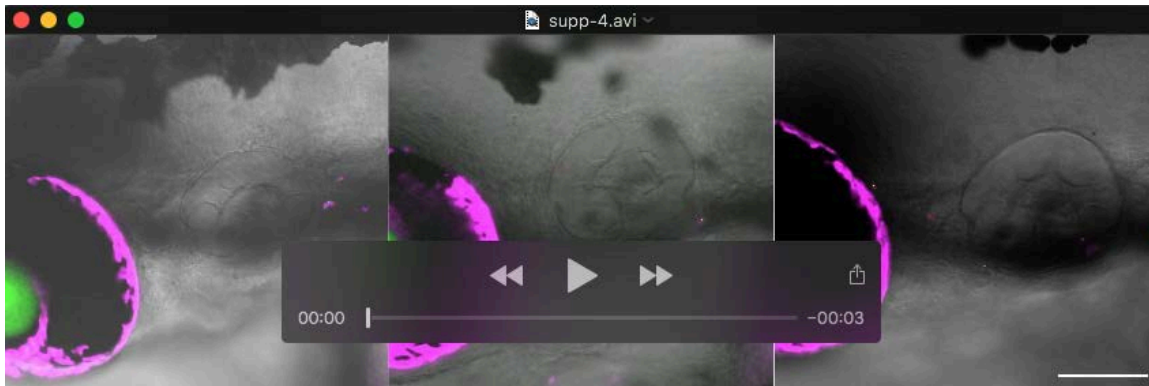

**Movie 5. Tracked movies of neutrophil motility in the head mesenchyme transiently expressing *rac2*-R-WT, *rac2*-R-DN, or *rac2*-R-CA.** The video shows the motility of neutrophils in 3 dpf *Tg(lyzC:Cas9, cry:GFP)<sup>pu26</sup>* zebrafish larvae injected with plasmids carrying *rac2* sgRNAs along with *rac2*-R-WT, *rac2*-R-DN, or *rac2*-R-CA. Videos were recorded for 30 min with 1 min interval. Representative videos from n = 3 independent experiments with 3 fish each group are shown. Scale bar: 100  $\mu$ m.

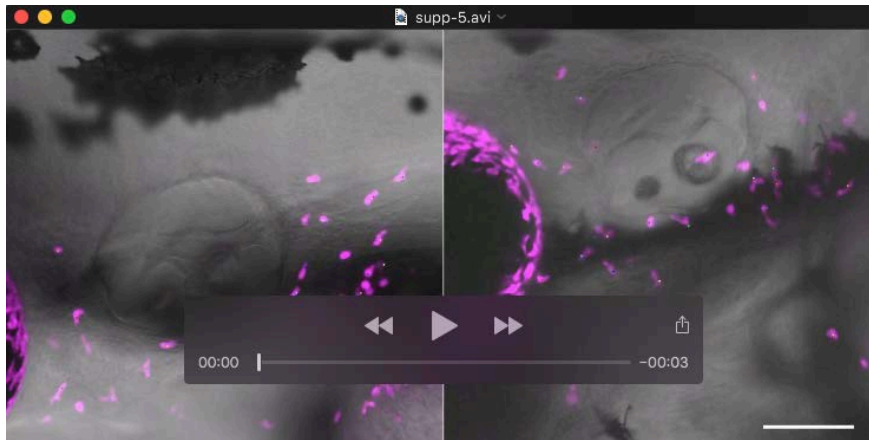

**Movie 6. Migrating neutrophils in the head mesenchyme of the *rac2*-CA and the *rac2*-CA lines.** The video shows the motility of neutrophils in 3 dpf *Tg(lyzC:rac2-WT-2a-mcherry)<sup>pu30</sup>* or *Tg(lyzC:rac2-CA-2a-mcherry)<sup>pu29</sup>* zebrafish larvae. Videos were recorded for 30 min with 1 min interval. Representative videos from n = 3 independent experiments with 3 fish each group are shown. Scale bar: 100  $\mu$ m.

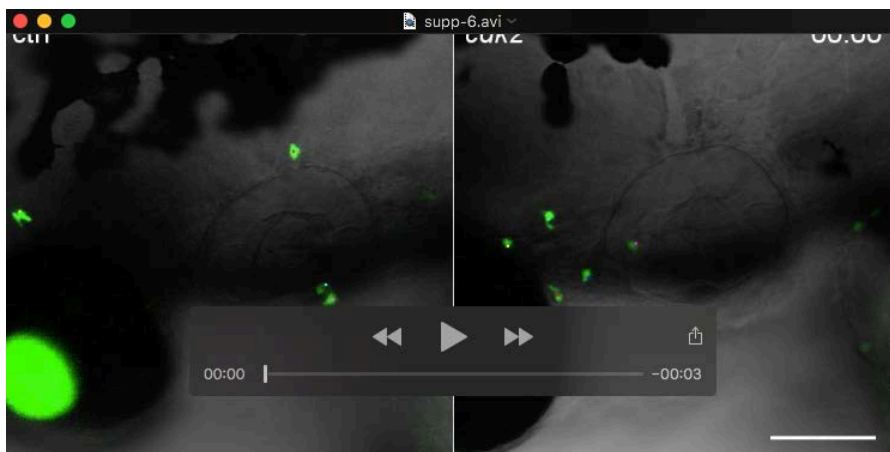

**Movie 7. Tracked movies of migrating neutrophils in the head mesenchyme transiently expressing control or *cdk2* sgRNAs.** The video shows the motility of neutrophils in 3 dpf *Tg(lyzC:Cas9, cry:GFP)<sup>pu26</sup>* zebrafish larvae injected with plasmids carrying control or *cdk2* sgRNAs. Videos were recorded for 30 min with 1 min interval. Representative videos from n = 3 independent experiments with 3 fish each group are shown. Scale bar: 100  $\mu$ m.

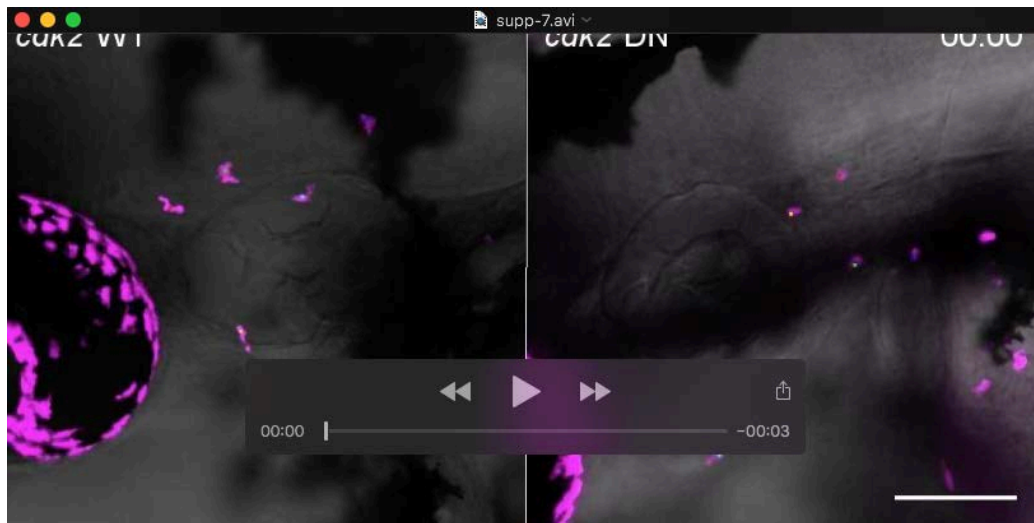

**Movie 8. Transient expression of *cdk2*-R-WT, not *cdk2*-R-DN, restored cell motility in *cdk2*-deficient neutrophils.** The video shows the motility of neutrophils in 3 dpf *Tg(lyzC:Cas9, cry:GFP)<sup>pu26</sup>* zebrafish larvae injected with plasmids containing *cdk2* sgRNAs along with *cdk2*-R-WT or *cdk2*-R-DN. Videos were recorded for 30 min with 1 min interval. Representative videos from n = 3 independent experiments with 3 fish each group are shown. Scale bar: 100  $\mu$ m.

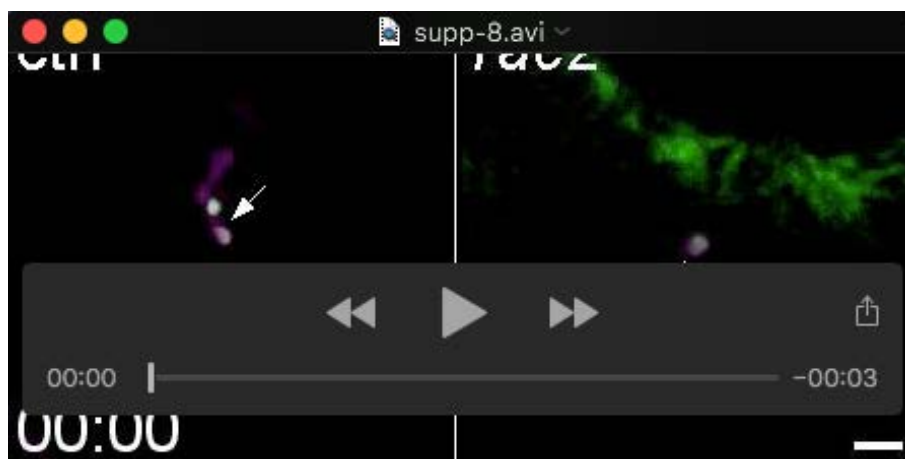

**Movie 9. Neutrophil-specific *rac2* knockout lead to deficiency in the front-to-rear localization of Rac in neutrophils.** The video shows the subcellular localization of PBD-GFP, which marks the location of Rac in neutrophils of 3 dpf *Tg(lyzC:Cas9, cry:GFP)<sup>pu26</sup>* zebrafish larvae injected with plasmids containing control or *rac2* sgRNAs. Cytoplasm is labeled with mCherry. Scale bar: 20  $\mu$ m.

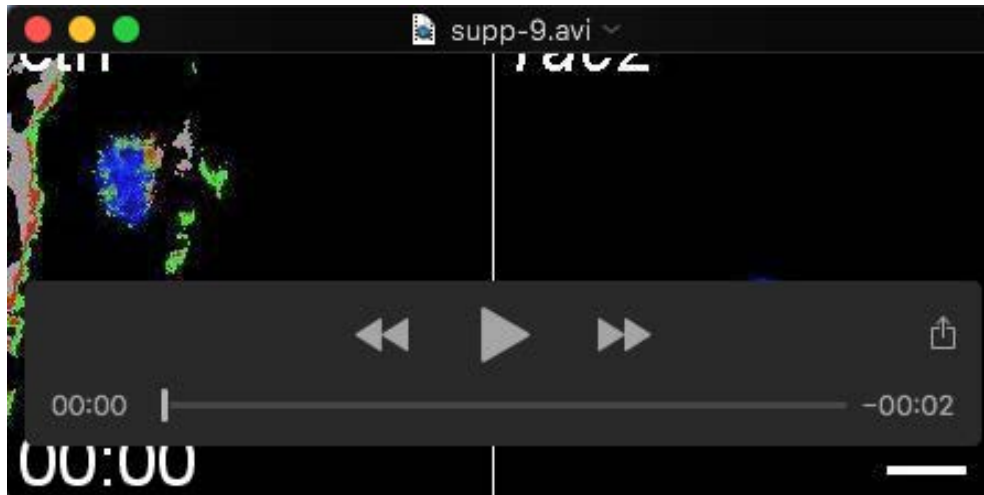

**Movie 10. Neutrophil-specific *rac2* knockout abolished the oscillation between the front and rear of active Rac in neutrophils.** The video shows the subcellular localization of Rac-FRET, of which the YFP/CFP fluorescence ratio indicates the location of active Rac in neutrophils of 3 dpf *Tg(lyzC:Cas9, cry:GFP)<sup>pu26</sup>* zebrafish larvae injected with plasmids containing control or *rac2* sgRNAs. Scale bar: 10  $\mu$ m.

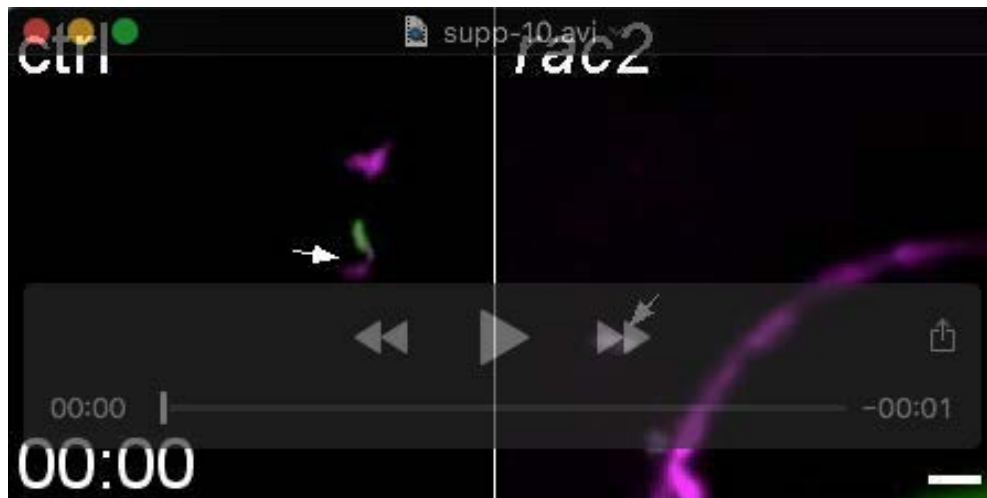

**Movie 11. Neutrophil-specific *rac2* knockout induced stable F-actin changes in neutrophils.** The video shows neutrophils expressing GFP-UtrCH, which labels stable F-actin, along with control or *rac2* sgRNAs in 3 dpf *Tg(lyzC:Cas9, cry:GFP)<sup>pu26</sup>* zebrafish larvae. Cytoplasm is labeled with mCherry. Scale bar: 20  $\mu$ m.



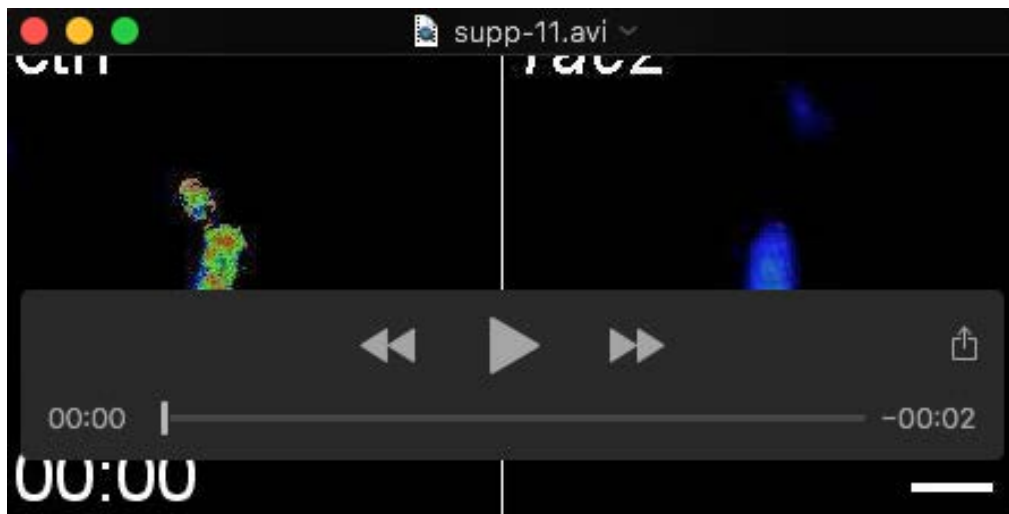

**Movie 12. Neutrophil-specific *rac2* knockout abrogated the generated actin stress at the front and the back.** The video shows neutrophils expressing AcpA-FRET along with control or *rac2* sgRNAs in 3 dpf *Tg(lyzC:Cas9, cry:GFP)<sup>pu26</sup>* zebrafish larvae. The ratiometric AcpA-FRET signals report the actin force in neutrophils. Scale bar: 100  $\mu$ m.

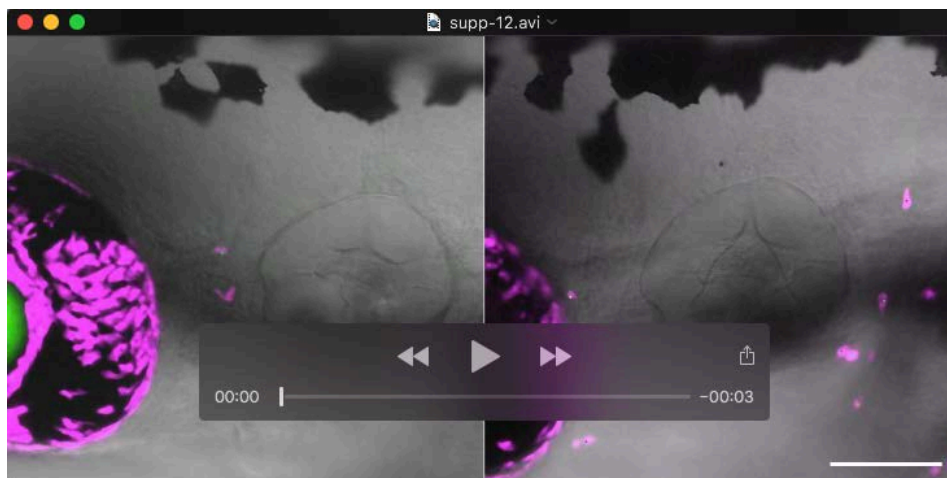

**Movie 13. Tracked movies of migrating neutrophils in the head mesenchyme transiently expressing control or *rac2* sgRNAs.** The video shows the motility of neutrophils in 3 dpf *Tg(ubb:cas9, cry:GFP)<sup>xt48</sup>* zebrafish larvae injected with plasmids carrying Ribozyme-processing machinery along with the control or *rac2* sgRNAs. Videos were recorded for 30 min with 1 min interval. Representative videos from n = 3 independent experiments with 3 fish each group are shown. Scale bar: 100  $\mu$ m.

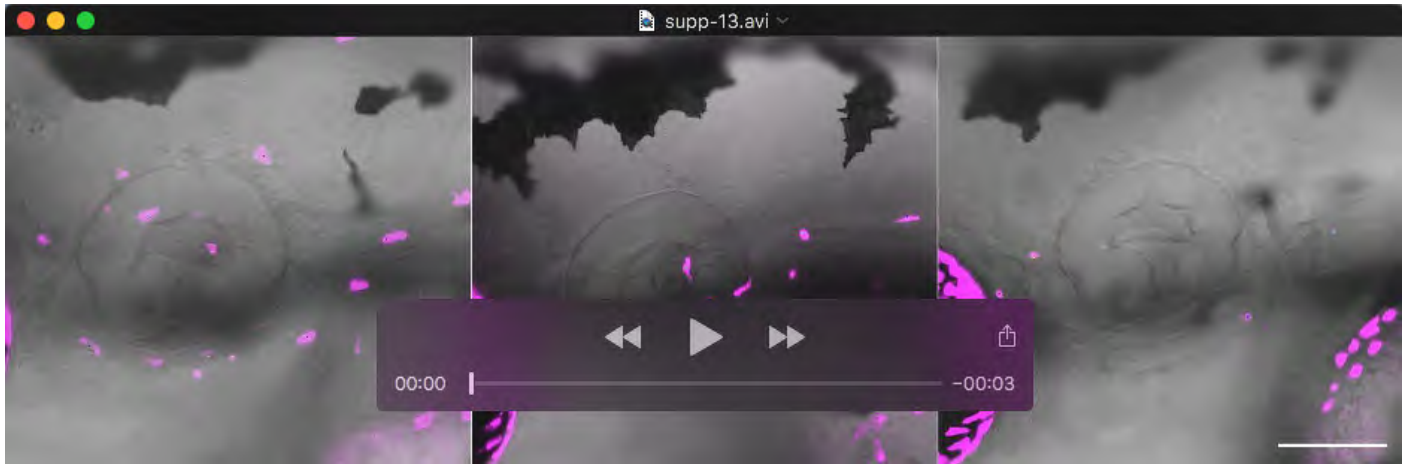

**Movie 14. Tracked movies of migrating neutrophils in the head mesenchyme of zebrafish transiently expressing the neutrophil specific RFP with or without control or *rac2* sgRNAs.**

The video shows the motility of neutrophils in 3 dpf wide-type AB zebrafish larvae transiently expressing RFP with or without control sgRNA or *rac2* sgRNA in neutrophils. Videos were recorded for 30 min with 1 min interval. Representative videos from n = 3 independent experiments with 4 fish each group are shown. Scale bar: 100  $\mu$ m.

**Table S1. Oligo design template tool for ribozyme sgRNAs**

[Click here to download Table S1](#)
